# Supplementary material
Source: PubMed Central journal article supplement (PMC7233305)

# Supplementary Appendix

## I) Mutation Analyses:

We identified the following *ALPL* and *PHEX* mutations in our study patients with HPP and XLH, respectively (Table S-1).

**Table S-1**  
Mutations in *ALPL* and *PHEX* in HPP and XLH, respectively

| Diagnosis        | Sex | Mutation #1                 | Mutation #2                     |
|------------------|-----|-----------------------------|---------------------------------|
| Hypophosphatasia | M   | c.1432A>T, p.Asn478Tyr*     |                                 |
| “                | M   | c.1133A>T, p.Asp378Val      |                                 |
| “                | F   | c.1133A>T, p.Asp378Val      |                                 |
| “                | F   | c.1172G>A, p.Arg391His      |                                 |
| “                | F   | c.571G>A, p.Glu191Lys       | c.550C>T, p.Arg184Trp           |
| “                | F   | c.1133A>T, p.Asp378Val      |                                 |
| “                | M   | c.212G>A, p.Arg71His        |                                 |
| “                | M   | c.550C>T, p.Arg184Trp       |                                 |
| “                | M   | c.571G>A, p.Glu191Lys       | c.1132G>C, p.Arg378His          |
| “                | M   | c.129delT, p.Gln44ArgfsX23  | c.1307A>G, p.Tyr436Cys          |
| “                | M   | C.151G>T, p.Ala51Ser        | c.400_401AC>CA, p.Thr134His     |
| “                | F   | C.151G>T, p.Ala51Ser        | c.400_401AC>CA, p.Thr134His     |
| “                | M   | c.1133A>T, p.Asp378Val      |                                 |
| “                | M   | c.427delC, p.Gln143ArgfsX22 | c.1444C>A, p.His482Asn          |
| “                | M   | c.422C>A, p.Thr141Asn       | c.629A>G, p.His210Arg           |
| “                | M   | c.400_401AC>CA, p.Thr134His | c.571G>A, p.Glu191Lys           |
| “                | F   | IVS9 c.997+3A>G             | c.1181_1182delCT, p.Ser394fsX10 |
| “                | F   | c.1285G>A, p.Glu429Lys      |                                 |
| “                | M   | c.1133A>T, p.Asp378Val      |                                 |
| “                | M   | c.571G>A, p.Glu191Lys       | c.881A>C, p.Asp294Ala           |
| “                | M   | c.1250A>G, p.Asn417Ser      |                                 |
| “                | M   | c.346G>A, p.Ala116Thr       |                                 |
| “                | F   | N.D.                        |                                 |
| “                | M   | c.180T>C, p.Asp60Glu        |                                 |
| “                | M   | c.1133A>T, p.Asp378Val      |                                 |
| “                | M   | c.1133A>T, p.Asp378Val      |                                 |
| “                | F   | c.1133A>T, p.Asp378Val      |                                 |
| “                | M   | c.526G>A, p.Ala176Thr       | c.881A>C, p.Asp294Ala           |
| “                | F   | c.1133A>T, p.Asp378Val      |                                 |
| “                | M   | c.571G>A, p.Glu191Lys       | c.881A>C, p.Asp294Ala           |
| “                | F   | N.D.                        |                                 |
| “                | F   | c.1240C>A, p.Leu414Met      |                                 |
| “                | F   | c.571G>A p.Glu191Lys        | c.1001G>A, p.Gly334Asp          |
| “                | M   | IVS10 c.1189+5 del C        | c.1328C>T, p.Ala443Val          |
| “                | F   | c.931G>A, p.Glu311Lys       | c.1363G>A, p.Gly455Ser          |

| Diagnosis                 | Sex | Mutation #1                   | Mutation #2            |
|---------------------------|-----|-------------------------------|------------------------|
| Hypophosphatasia          | F   | c.931G>A, p.Glu311Lys         | c.1363G>A, p.Gly455Ser |
| “                         | F   | IVS3 c.182-2 A>C              |                        |
| “                         | M   | c.571G>A, p.Glu191Lys         | c.1001G>A, p.Gly334Asp |
| “                         | F   | c.526G>A, p.Ala176Thr         | c.881A>C, p.Asp294Ala  |
| “                         | M   | c.212G>C, p.Arg71Pro          |                        |
| “                         | F   | c.932A>G, p.Glu311Gly*        |                        |
| X-Linked Hypophosphatemia | F   | c.1520T>C, p.Leu507Pro        |                        |
| “                         | F   | IVS15 c.1645+1G>A             |                        |
| “                         | M   | c.*231A>G                     |                        |
| “                         | M   | c.*231A>G                     |                        |
| “                         | F   | c.2102_2102delC, p.Arg702fs   |                        |
| “                         | F   | c.15_16delAG, p.Gly6fsX44     |                        |
| “                         | F   | IVS9 c.1080-2A>G              |                        |
| “                         | M   | none                          |                        |
| “                         | M   | c.*231A>G                     |                        |
| “                         | F   | del of exons 13 thru 22       |                        |
| “                         | F   | N.D.                          |                        |
| “                         | M   | c.*231A>G                     |                        |
| “                         | M   | c.*231A>G                     |                        |
| “                         | M   | c.*231A>G                     |                        |
| “                         | M   | c.1204C>T, p.Gln402Ter        |                        |
| “                         | M   | c.163_164ins T, p.Lys56fs     |                        |
| “                         | M   | none                          |                        |
| “                         | M   | c.*231A>G                     |                        |
| “                         | M   | c.*231A>G                     |                        |
| “                         | M   | c.*231A>G                     |                        |
| “                         | F   | c.830T>A, p.Leu277Ter         |                        |
| “                         | F   | none                          |                        |
| “                         | M   | c.2078G>A, p.Cys693Tyr        |                        |
| “                         | M   | c.*231A>G                     |                        |
| “                         | F   | IVS15 c.1645+1G>A             |                        |
| “                         | F   | c.1645C>T, p.Arg549XTer       |                        |
| “                         | M   | c.*231A>G                     |                        |
| “                         | M   | N.D.                          |                        |
| “                         | F   | none                          |                        |
| “                         | M   | N.D.                          |                        |
| “                         | M   | c.2250G>C, p.Ter750Tyr        |                        |
| “                         | F   | c.763_784dup, p.Ala262GlyfsX9 |                        |
| “                         | F   | c.807delT, p.His269GlnfsX3    |                        |
| “                         | M   | IVS10 c.1173+2T>C             |                        |
| “                         | F   | N.D.                          |                        |
| “                         | M   | IVS10 c.1173+2T>C             |                        |
| “                         | M   | N.D.                          |                        |
| “                         | M   | N.D.                          |                        |
| “                         | F   | IVS5 c.663+2T>A               |                        |
| “                         | M   | c.2104C>T, p.Arg702Ter        |                        |
| “                         | F   | none                          |                        |

| Diagnosis                 | Sex | Mutation #1                         | Mutation #2 |
|---------------------------|-----|-------------------------------------|-------------|
| X-Linked Hypophosphatemia | F   | c.871C>T, p.Arg291Ter               |             |
| “                         | F   | c.960_961insGTCATTGA, p.Asp323fsX11 |             |
| “                         | F   | none                                |             |
| “                         | M   | none                                |             |
| “                         | F   | c.1209G>A, p.Trp403Ter              |             |
| “                         | F   | none                                |             |
| “                         | F   | N.D.                                |             |
| “                         | F   | c.1522C>T, p.Gln508Ter              |             |
| “                         | M   | c.1942G>A, p.Gly648Arg              |             |
| “                         | F   | c.587 delG, p.Gly196fs              |             |
| “                         | F   | none                                |             |
| “                         | F   | c.2237G>A, p.Cys746Tyr              |             |
| “                         | F   | c.*231A>G                           |             |
| “                         | M   | c.65_65delC, p.Leu23fs              |             |
| “                         | F   | c.1601C>T, p.Pro534Leu              |             |
| “                         | M   | c.1601C>T, p.Pro534Leu              |             |
| “                         | M   | none                                |             |
| “                         | M   | N.D.                                |             |
| “                         | F   | none                                |             |
| “                         | M   | N.D.                                |             |
| “                         | F   | c.1735G>A, p.Gly579Arg              |             |
| “                         | F   | c.1735G>A, p.Gly579Arg              |             |
| “                         | M   | large deletion                      |             |
| “                         | M   | c.2041_2043delAAC, p.Asn680del      |             |
| “                         | F   | c.2041_2043delAAC, p.Asn680del      |             |
| “                         | M   | c.*231A>G                           |             |
| “                         | F   | IVS16 c.1701-2A>C                   |             |
| “                         | M   | none                                |             |
| “                         | F   | none                                |             |
| “                         | M   | c.2104C>T, p.Arg702Ter              |             |
| “                         | F   | c.2064, p.Tyr688Ter                 |             |
| “                         | M   | c.1735G>A, p.Gly579Arg              |             |

\*Asterisk at end of mutation = novel *ALPL* mutation.

"none" = no mutation detected by sequencing coding region and mRNA splice sites.

N.D. = sequencing not done.

## II) Preteenage Serum Biochemical Findings:

To minimize any impact of puberty on the serum biochemical findings, here we restricted statistical analyses to the preteenage subjects (**Tables S-2 to S-12; Figures S1 to S-11**).

**Table S-2: Study Subject Years-Of-Age & Sex**

| Group | N  | Mean (SD)  | Min, Max  | Girls | Boys |
|-------|----|------------|-----------|-------|------|
| CTR   | 9  | 10.2 (1.7) | 7.7, 12.6 | 7     | 2    |
| XLH   | 64 | 7.7 (2.8)  | 2.3, 12.6 | 33    | 31   |
| HPP   | 31 | 6.5 (4.1)  | 1.2, 12.8 | 12    | 19   |

**Figure S-1: Serum Alkaline Phosphatase**

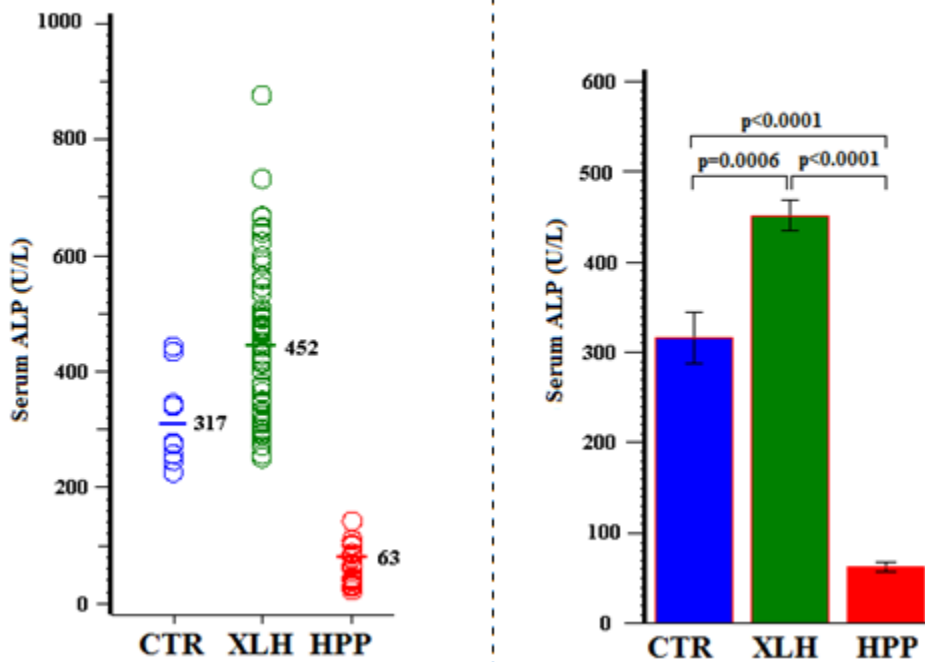

**Table S-3: Serum Alkaline Phosphatase**

| Group | N  | Mean (SD) | Min, Max | 95% CI   | P (Group Comparisons) |
|-------|----|-----------|----------|----------|-----------------------|
| CTR   | 9  | 317 (80)  | 227, 444 | 255, 378 | 0.0006 (XLH vs CTR)   |
| XLH   | 64 | 452 (132) | 252, 877 | 416, 479 | <0.0001 (HPP vs CTR)  |
| HPP   | 31 | 63 (29)   | 23, 143  | 52, 74   | <0.0001 (XLH vs HPP)  |

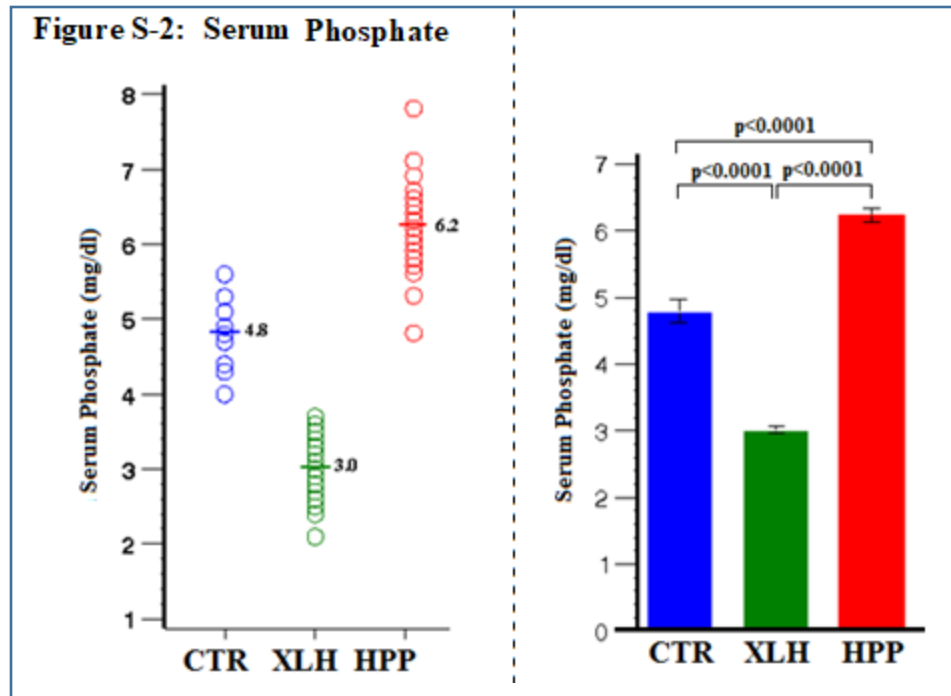

**Table S-4: Serum Phosphate**

| Group | N  | Mean (SD) | Min, Max | 95% CI   | P (Group Comparisons) |
|-------|----|-----------|----------|----------|-----------------------|
| CTR   | 9  | 4.8 (0.5) | 4.0, 5.6 | 4.4, 5.2 | <0.0001 (XLH vs CTR)  |
| XLH   | 64 | 3.0 (0.4) | 2.1, 3.7 | 2.9, 3.2 | <0.0001 (HPP vs CTR)  |
| HPP   | 31 | 6.2 (0.6) | 4.8, 7.8 | 6.0, 6.5 | <0.0001 (XLH vs HPP)  |

**Table S-5:<sup>(23)</sup>**

| Serum Phosphate (age<13) | N   | Mean/Median (SD) | 95% CI of Mean | Range (min, max) | P-value (compare to control) |
|--------------------------|-----|------------------|----------------|------------------|------------------------------|
| Normal                   | 43  | 4.9 / 4.9 (0.4)  | 4.8, 5.0       | 3.8, 5.9         |                              |
| Odonto                   | 63  | 6.0 / 6.1 (0.5)  | 5.8, 6.1       | 4.4, 7.0         | <0.0001                      |
| Mild childhood           | 37  | 6.2 / 6.2 (0.4)  | 6.0, 6.3       | 5.0, 7.2         | <0.0001                      |
| Severe Childhood         | 53  | 6.1 / 6.2 (0.7)  | 5.9, 6.3       | 4.3, 7.1         | <0.0001                      |
| Infantile                | 12  | 6.1 / 6.1 (0.5)  | 5.8, 6.4       | 5.5, 6.9         | <0.0001                      |
| Cohort                   | 165 | 6.1 / 6.1 (0.5)  | 6.0, 6.2       | 4.3, 7.2         | <0.0001                      |

Figure S-3<sup>(23)</sup>: Serum Phosphate vs HPP Severity

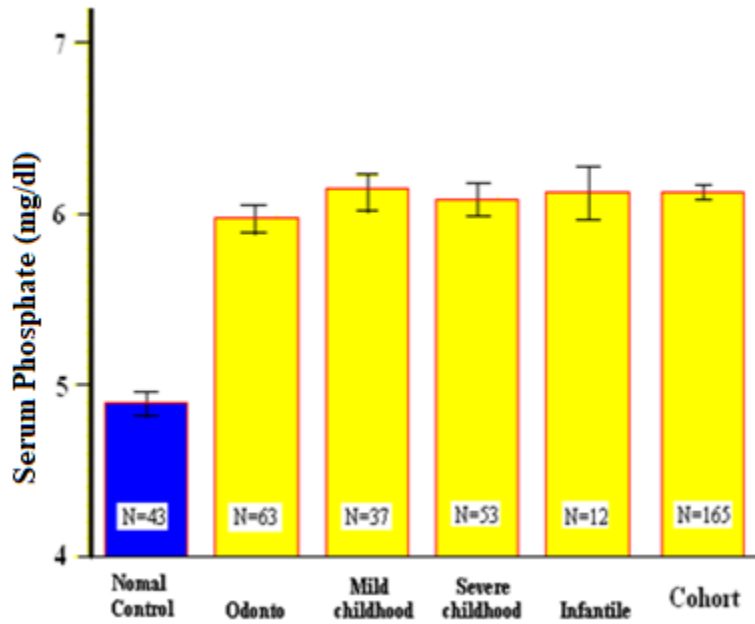

Figure S-4: Serum Calcium (Total)

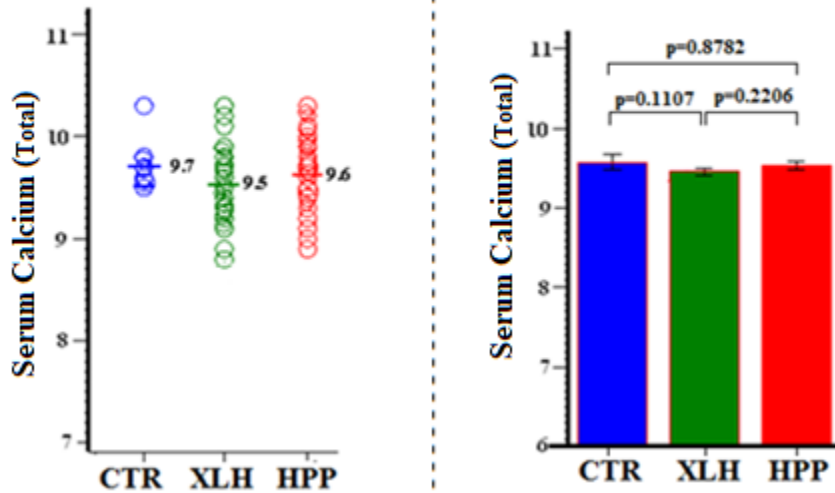

**Table S-6: Serum Calcium (Total)**

| Group | N  | Mean (SD) | Min, Max  | 95% CI   | P (Group Comparisons) |
|-------|----|-----------|-----------|----------|-----------------------|
| CTR   | 9  | 9.7 (0.2) | 9.5, 10.3 | 9.5, 9.9 | 0.1107 (XLH vs CTR)   |
| XLH   | 64 | 9.5 (0.3) | 8.7, 10.3 | 9.4, 9.6 | 0.8782 (HPP vs CTR)   |
| HPP   | 31 | 9.6 (0.3) | 9.0, 10.3 | 9.6, 9.8 | 0.2206 (XLH vs HPP)   |

**Figure S-5 : Serum Calcium (Ionized)**

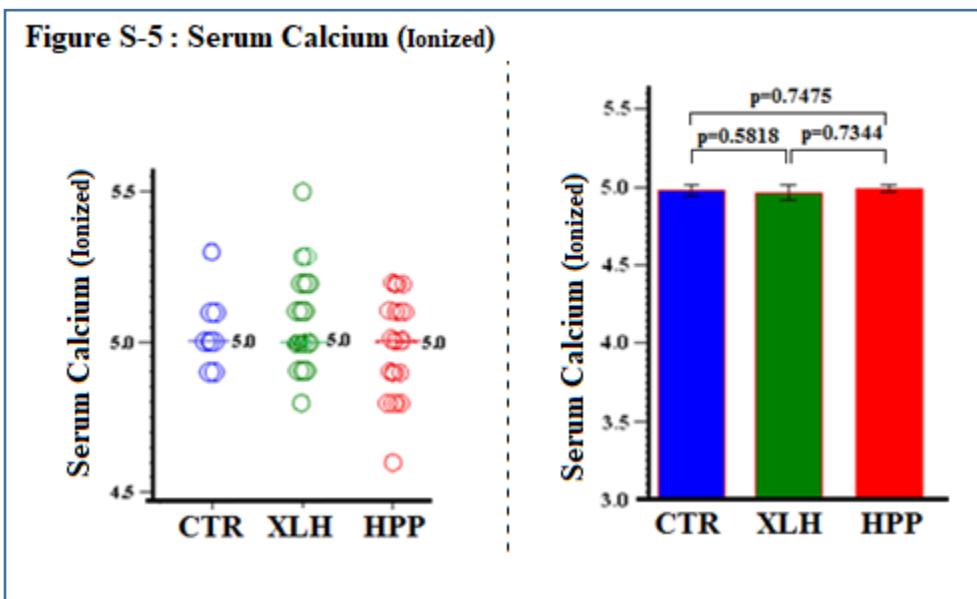

**Table S-7: Serum Calcium (Ionized)**

| Group | N  | Mean (SD)  | Min, Max | 95% CI   | P (Group Comparisons) |
|-------|----|------------|----------|----------|-----------------------|
| CTR   | 9  | 5.0 (0.12) | 4.9, 5.3 | 4.9, 5.1 | 0.5818 (XLH vs CTR)   |
| XLH   | 64 | 5.0 (0.14) | 4.7, 5.5 | 4.9, 5.1 | 0.7475 (HPP vs CTR)   |
| HPP   | 31 | 5.0 (0.13) | 4.6, 5.2 | 4.9, 5.1 | 0.7344 (XLH vs HPP)   |

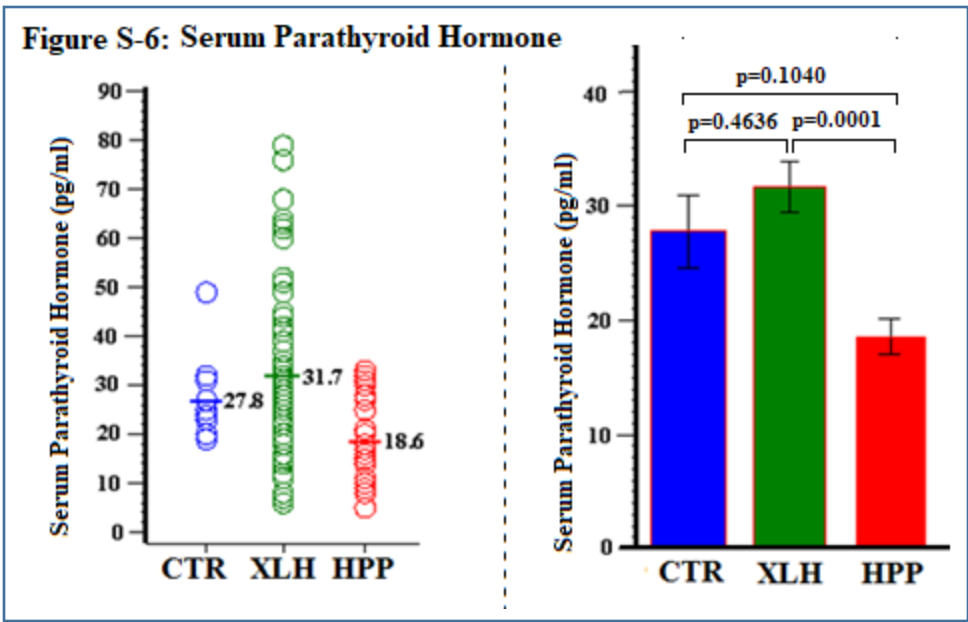

**Table S-8: Serum Parathyroid Hormone**

| Group | N  | Mean (SD)   | Min, Max | 95% CI     | P (Group Comparisons) |
|-------|----|-------------|----------|------------|-----------------------|
| CTR   | 9  | 27.8 (9.1)  | 19, 49   | 20.8, 34.8 | 0.4636 (XLH vs CTR)   |
| XLH   | 64 | 31.7 (17.6) | 6, 79    | 27.2, 35.8 | 0.1040 (HPP vs CTR)   |
| HPP   | 31 | 18.6 (8.3)  | 5, 33    | 15.5, 21.6 | 0.0001 (XLH vs HPP)   |

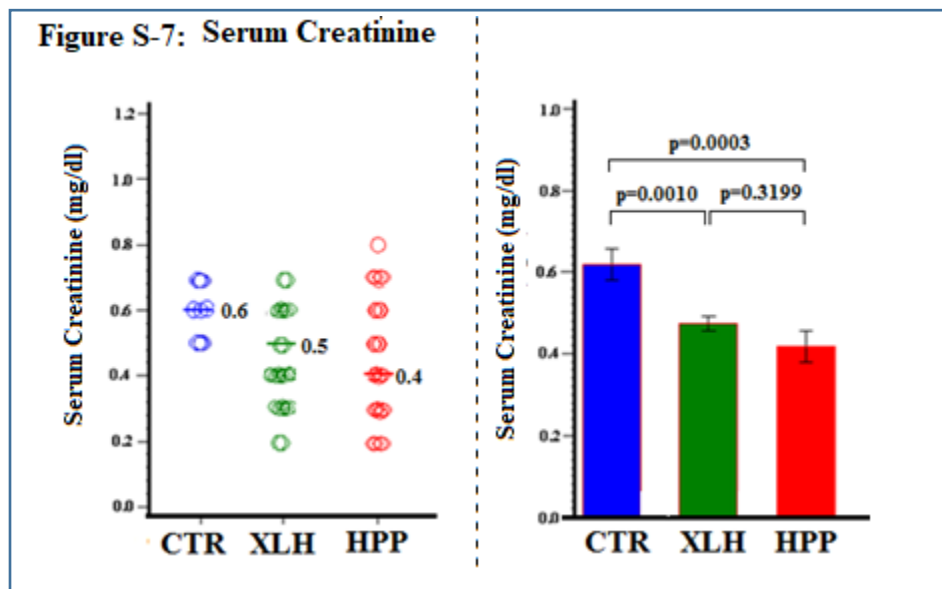



**Table S-9: Serum Creatinine**

| Group | N  | Mean (SD) | Min, Max | 95% CI   | P (Group Comparisons) |
|-------|----|-----------|----------|----------|-----------------------|
| CTR   | 9  | 0.6 (0.1) | 0.5, 0.7 | 0.6, 0.7 | 0.0010 (XLH vs CTR)   |
| XLH   | 64 | 0.5 (0.1) | 0.2, 0.7 | 0.4, 0.5 | 0.0003 (HPP vs CTR)   |
| HPP   | 31 | 0.4 (0.2) | 0.2, 0.8 | 0.4, 0.5 | 0.3199 (XLH vs HPP)   |

**Figure S-8: Serum FGF23**

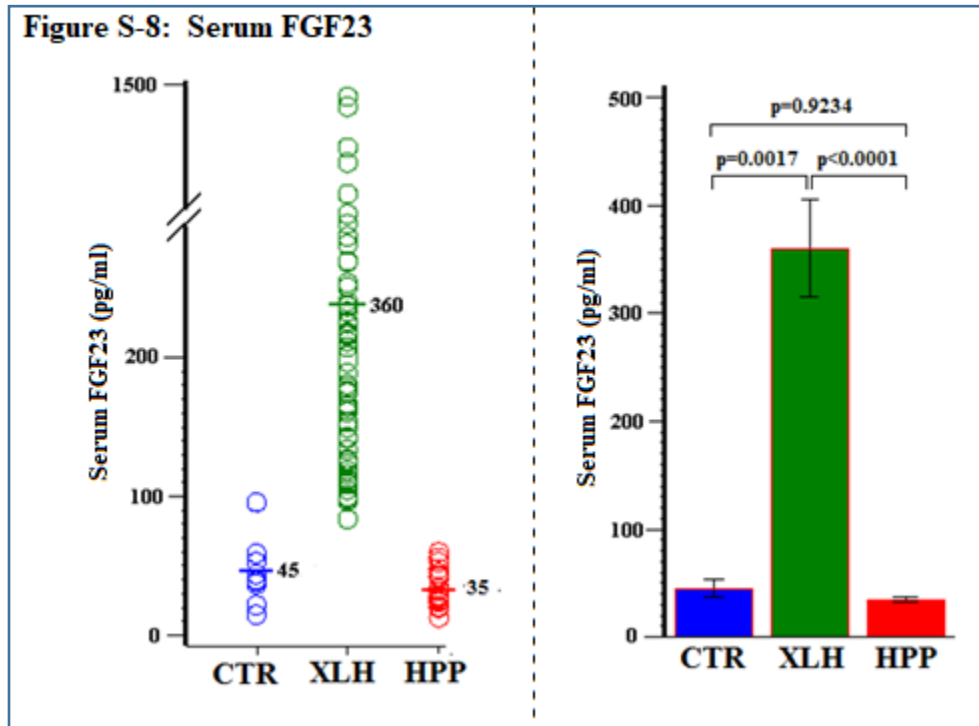

**Table S-10: Serum FGF23**

| Group | N  | Mean (SD) | Min, Max | 95% CI     | P (Group Comparisons) |
|-------|----|-----------|----------|------------|-----------------------|
| CTR   | 9  | 45 (24)   | 15, 96   | 26.9, 63.1 | 0.0017 (XLH vs CTR)   |
| XLH   | 58 | 360 (341) | 84, 1442 | 273, 450   | 0.9234 (HPP vs CTR)   |
| HPP   | 26 | 35 (12)   | 13, 60   | 30.0, 39.8 | <0.0001 (XLH vs HPP)  |

**Figure S-9: Serum sFRP4**

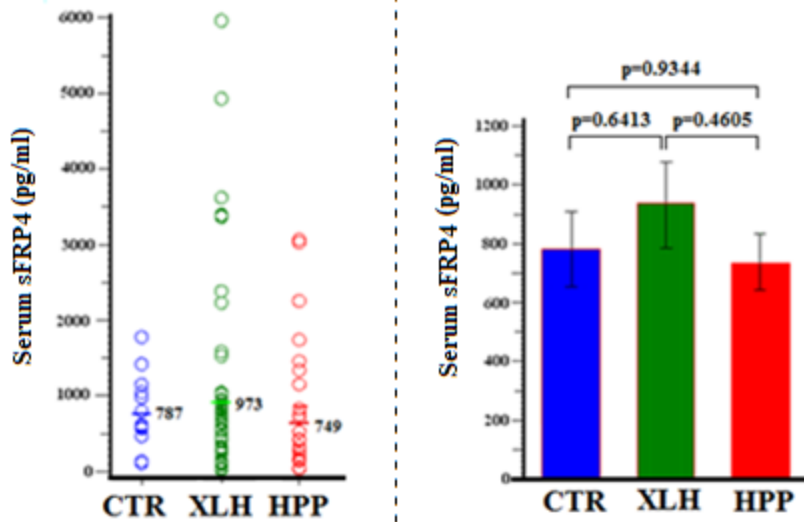

**Table S-11: Serum sFRP4**

| Group | N  | Mean (SD)      | Min, Max  | 95% CI    | P (Group Comparisons) |
|-------|----|----------------|-----------|-----------|-----------------------|
| CTR   | 9  | 787.2 (566.1)  | 113, 1779 | 352, 1222 | 0.6413 (XLH vs CTR)   |
| XLH   | 53 | 973.5 (1252.7) | 23, 5965  | 663, 1328 | 0.9344 (HPP vs CTR)   |
| HPP   | 18 | 749.4 (759.9)  | 52, 3031  | 372, 1128 | 0.4605 (XLH vs HPP)   |

**Figure S-10: Serum FGF7**

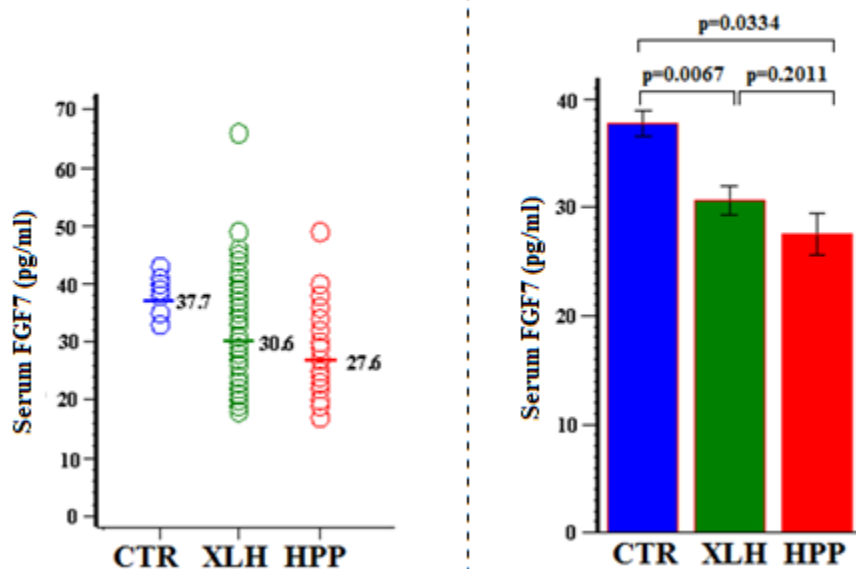

**Table S-12: Serum FGF7**

| Group            | N  | Mean (SD)  | Min, Max | 95% CI     | P (Group Comparisons)                                             |
|------------------|----|------------|----------|------------|-------------------------------------------------------------------|
| CTR              | 9  | 37.7 (3.4) | 33, 43   | 35.1, 40.2 | 0.0067 (XLH vs CTR)<br>0.0334 (HPP vs CTR)<br>0.2011 (XLH vs HPP) |
| XLH              | 55 | 30.6 (9.8) | 18, 66   | 28.5, 33.8 |                                                                   |
| HPP              | 21 | 27.6 (8.6) | 17, 49   | 23.6, 31.5 |                                                                   |
| Odonto           | 5  | 34.6 (9.7) | 22, 49   | 22.6, 46.6 | P = 0.0404 (regression analysis according to HPPSSC)              |
| Mild childhood   | 6  | 27.0 (9.6) | 17, 40   | 16.9, 37.1 |                                                                   |
| Severe childhood | 8  | 24.6 (6.4) | 17, 34   | 19.2, 30.0 |                                                                   |
| Infantile        | 2  | 23.5 (2.1) | 22, 25   | 4.4, 42.5  |                                                                   |

Figure S-11: Serum FGF7 vs HPPSSC

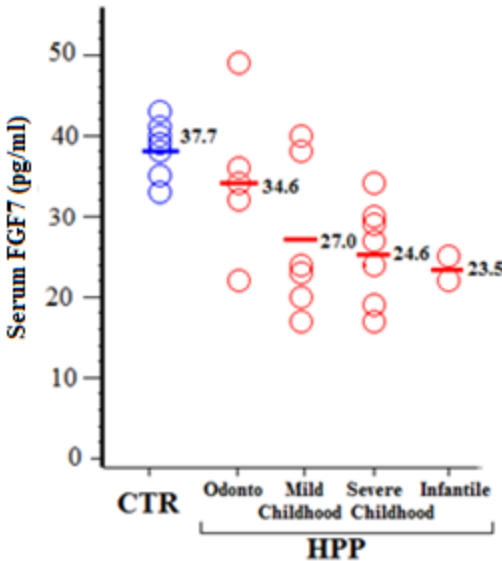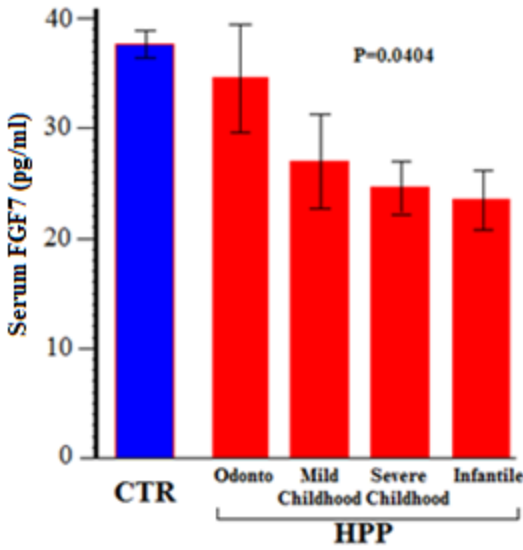

Supplement: NIHMS1579970-supplement-1.pdf [file NIHMS1579970-supplement-1.pdf]
